# Supplementary material for: A Conserved Supergene Locus Controls Colour Pattern Diversity in Heliconius Butterflies
Source: PLOS journal article supplement (doi:10.1371/journal.pbio.0040303), 2006-09-20
Supplement: S3 (10.1371/journal.pbio.0040303.s003) [file journal.pbio.0040303.s003]

**Figure S3. Alignment of *H. erato* *GerTra* sequences with *H. melpomene* BAC clone AEHM-41C10.** The PCR amplicons in *H. erato* being too large for complete sequencing, we provide here the alignment of both end sequences with the respective *H. melpomene* Rab geranylgeranyl transferaseexons from which the primers were designed. Exon 1 lies at position 19970:20290, and exon 2 at 21535:21846, with a 1245bp intron in between.

#NEXUS

[!This data assembled using CodonCode Aligner.]

begin data;

dimensions ntax=2 nchar=652;

format datatype=dna gap=: interleave;

matrix

Exon 1

H. melp. GerTra exon 1 ttatacttgtaaaatctgtggttctaacttcaacctatcaatggtttc

H. erato GerTra 1 ------------------------------------------------

H. melp. GerTra exon 1 ttgcggcatacaataagtagggttaacttgcttaatagtagagttccc

H. erato GerTra 1 ------------------------------------------------

H. melp. GerTra exon 1 taataaagatagtccggctaaaccgaataacgtgtggaaaggatcagt

H. erato GerTra 1 ------------------------------------------------

H. melp. GerTra exon 1 tatgtctccgggacggtcactgaaaccaccagtttcagaatcttgaca

H. erato GerTra 1 ------------------------------------------------

H. melp. GerTra exon 1 cgccagtatatattcttctagatttttcttgtcgacccagtgtattct

H. erato GerTra 1 ------------------------------------------------

H. melp. GerTra exon 1 gtttagcattgatagggaggacattacccacctgtaatatacatt---

H. erato GerTra 1 ---------------GGAGGACATTACCCACCTGTAATATAAATTAGA

H. melp. GerTra exon 1 ------------------------------------------------

H. erato GerTra 1 TTTTATCGTATTAATTCATTTATAATAGTAAGATTTAAAATAAATTTA

H. melp. GerTra exon 1 ------------------------------------------------

H. erato GerTra 1 GTTATAATATCCTATTTAATGAAGAATATTTTGTAATGTATTATTTTT

H. melp. GerTra exon 1 ------------------------------------------------

H. erato GerTra 1 TATTCTGACATCAAAAAGAGGCACATAATTTAAAATGTTTTTTATATA

H. melp. GerTra exon 1 ------------------------------------------------

H. erato GerTra 1 TACAAATATTTTATAATTTCCTTAATTTTATATAGAAATGTTTAACAT

H. melp. GerTra exon 1 ------------------------------------------------

H. erato GerTra 1 TCTAATAAAGCAGTAAGTGAGTCCATCTTACTTGGAAACTATAATAAT

H. melp. GerTra exon 1 ------------------------------------------------

H. erato GerTra 1 GTACAGTGCTAGAGATATTGGATACTTAATTTCTGCTAGGTGTATGTA

H. melp. GerTra exon 1 ------------------------------------------------

H. erato GerTra 1 ATATAATTAAGGCCGTCGTGGCAAAGTGGGGTAGCATCTCACTGTAAG

H. melp. GerTra exon 1 ----------------------------

H. erato GerTra 1 CGCGACGATTATAGGTTCAATCCTCACG

Exon 2.

H. melp. GerTra exon 2 ------------------------------------------------

H. erato GerTra 2 TTACCAAGAGAAAACACGTGGAGCTACAACAAATTGTAGCAGGAAAGT

H. melp. GerTra exon 2 ------------------------------------------------

H. erato GerTra 2 GCTTTGGATGATTGAGTTATTTATTAAAATTGCTAACCTTTTTTTATT

H. melp. GerTra exon 2 ------------------------------------------------

H. erato GerTra 2 AACATCTTAAAAAGTCATATTTTTAGACAATTTTAAACGAGGTAGTAG

H. melp. GerTra exon 2 ------------------------------------------------

H. erato GerTra 2 CGCCATAAGTGTGCGACTGTAAACGCGTAGGCTATGGGTTCGATTCTT

H. melp. GerTra exon 2 ------------------------------------------------

H. erato GerTra 2 ATTCGGGAGAATGAAATATTTAATATTTTATTCGGTCTTGTAACAGGA

H. melp. GerTra exon 2 ------------------------------------------------

H. erato GerTra 2 CAAAGTGCGGCATTGATTCCCACCACTAAGCATAGACAATCTCGACAA

H. melp. GerTra exon 2 ------------------------------------------------

H. erato GerTra 2 TTCGGCAGAAAGTGAATATGCGATATTTCGAGATATACTCGAAAGTTC

H. melp. GerTra exon 2 ------------------------------------------------

H. erato GerTra 2 AGTGGTATATTAACAGTGGGTTCCCGCTGCTTACCCCTGCTGTATGCG

H. melp. GerTra exon 2 ------------------------------------------------

H. erato GerTra 2 TGTTATAGCGTGATAGCTTAGTTTATAAAAAAATACAATTAAGCAAAA

H. melp. GerTra exon 2 -AATACCTGCATGACTTTCAGAACCAGGCTTAGATCCAAAACCTCCAT

H. erato GerTra 2 TAATACCCGCGTGACTCTCAGAACCAGGTTTAGATCCAAAACCGCCAT

H. melp. GerTra exon 2 CAAAATTCATACAGCTTAATACAAAATCAACAG-CTTTAGTTACATTT

H. erato GerTra 2 CAAAATTCATACAGCTTAACACAAAATCAACAGCCCTTGGTTACATTG

H. melp. GerTra exon 2 ATGGAGTCCAATTTATGCAATAATGAAAGACACATCACAGCGCAGAAA

H. erato GerTra 2 ATTGAGTACAACTTATGCAATAATGAAAGACACATCACAGCGCAG---

H. melp. GerTra exon 2 GAAAATCTTGTGTCAACTTCACCCCACTTGTCACCTAAGAAATTGAAA

H. erato GerTra 2 ------------------------------------------------

H. melp. GerTra exon 2 TTATTATATGTATTGATATTTATACCTTGTTTAGAAGACATTTTTTTT

H. erato GerTra 2 ------------------------------------------------

H. melp. GerTra exon 2 AATGTAAAGGGATTCAGTTGTCCAAGGGCTCTGATAACTAGGTTACAA

H. erato GerTra 2 ------------------------------------------------

H. melp. GerTra exon 2 CTCAATATTTTCTTAACACC

H. erato GerTra 2 --------------------

endblock;
